# Supplementary material
Source: Research Square preprint supplement (doi:10.21203/rs.3.rs-9884106/v1)
Supplement: Supplementary file 1 [file 7a912d733b8534e70666f81a.docx]

**Effect of radical scavenging extender on the chemical stability of anion exchange membrane under alkaline conditions**

Ara Cho1+, Min Suc Cha2+, Seung Won Baek1+, Se In Park1, Jeong Bang Ko1, Dae Hwan Shin1, Dong Chan Kim1, Sungjun Kim3, Jang Yong Lee1*

**Affiliations**

1 Division of Chemical, Biomolecular and Energy Engineering, Konkuk University, Seoul 05029, Republic of Korea

2 Water Energy Research Center, K-water Research Institute, Korea Water Resources Corporation, Daejeon 34045, Republic of Korea

3 Hydrogen Energy Research Center, Korea Research Institute of Chemical Technology, Daejeon 34114, Republic of Korea.

*E-mail: ljyljy78@konkuk.ac.kr

+ These authors contributed equally: Ara Cho, Min Suc Cha, Seung Won Baek

**Supporting Information**


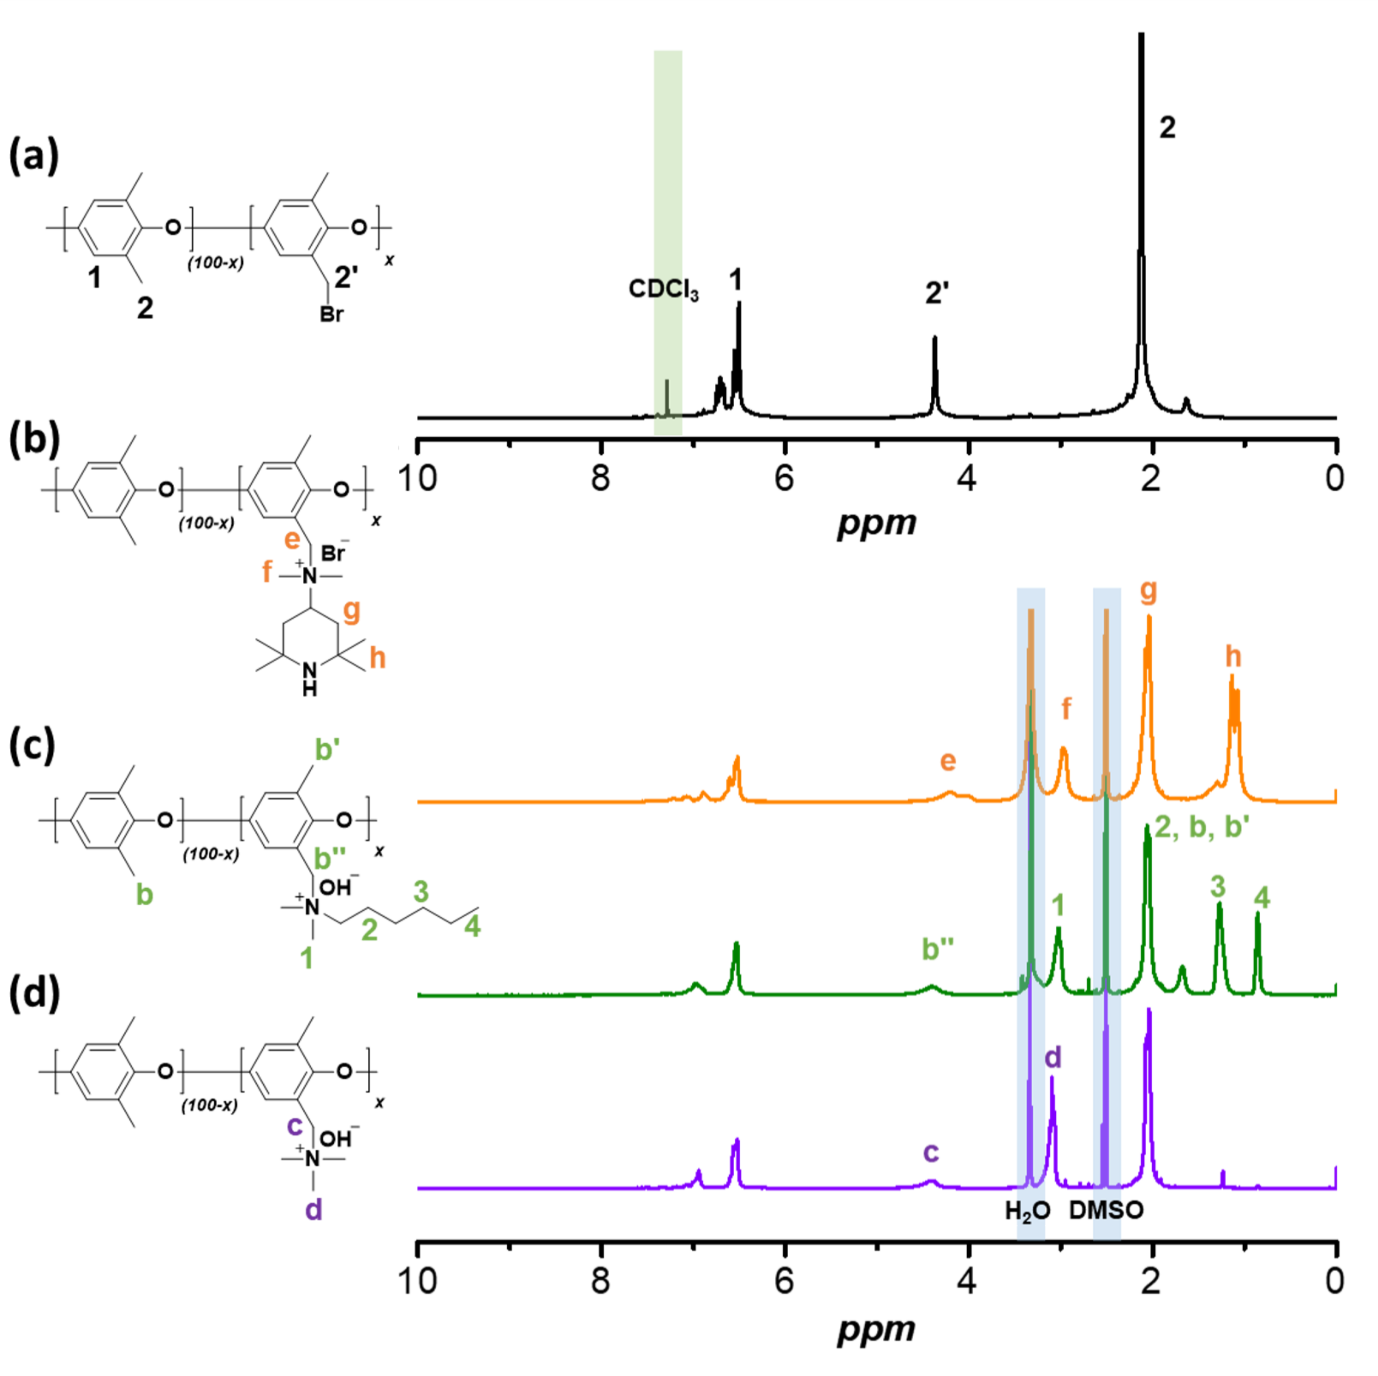


**Fig. S1** 1H NMR spectrum of (a) BrPPO-x, (b) QPPO-35-DATMP, (c) QPPO-35-DMHA,
and (d) QPPO-35-TMA.


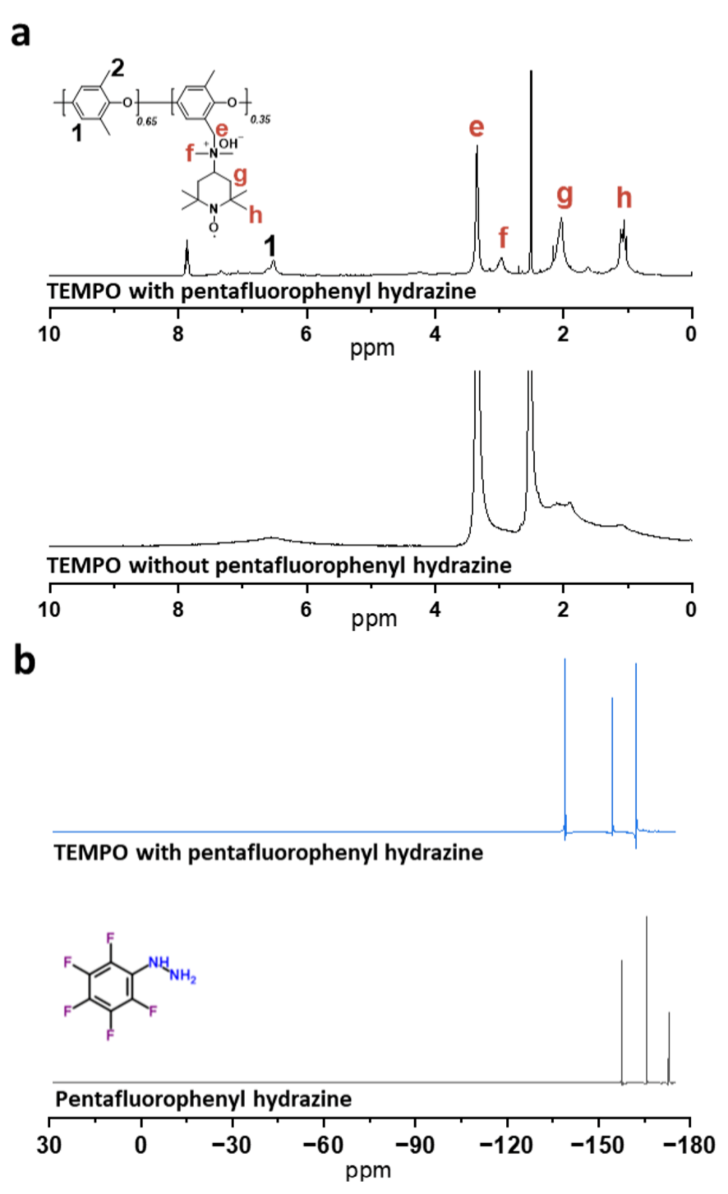


**Fig. S2** (a) 1H NMR spectra of QPPO-35-TEMPO before (top) and after (bottom) quenched by pentafluorophenyl hydrazine. (b) 19F NMR spectra of QPPO-35-TEMPO after quenched by pentafluorophenyl hydrazine (top) and pentafluorophenyl hydrazine (bottom).


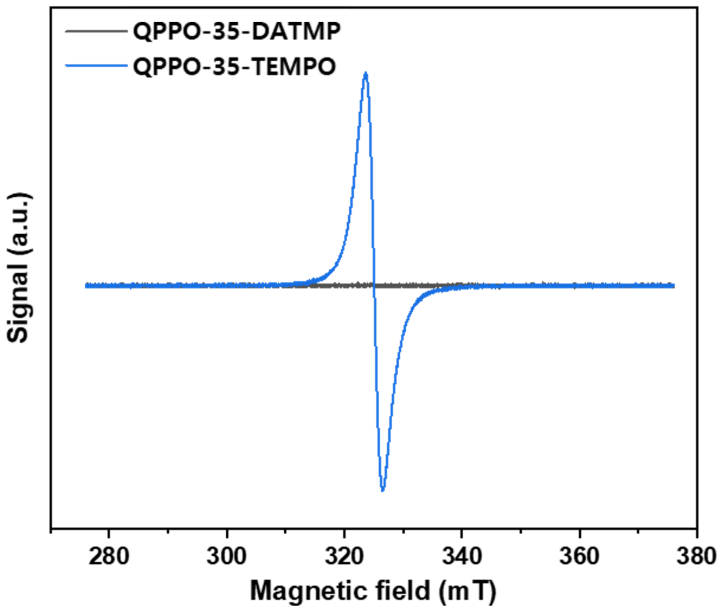


**Fig. S3** Comparison of EPR spectra QPPO-35-DATMP and QPPO-35-TEMPO.


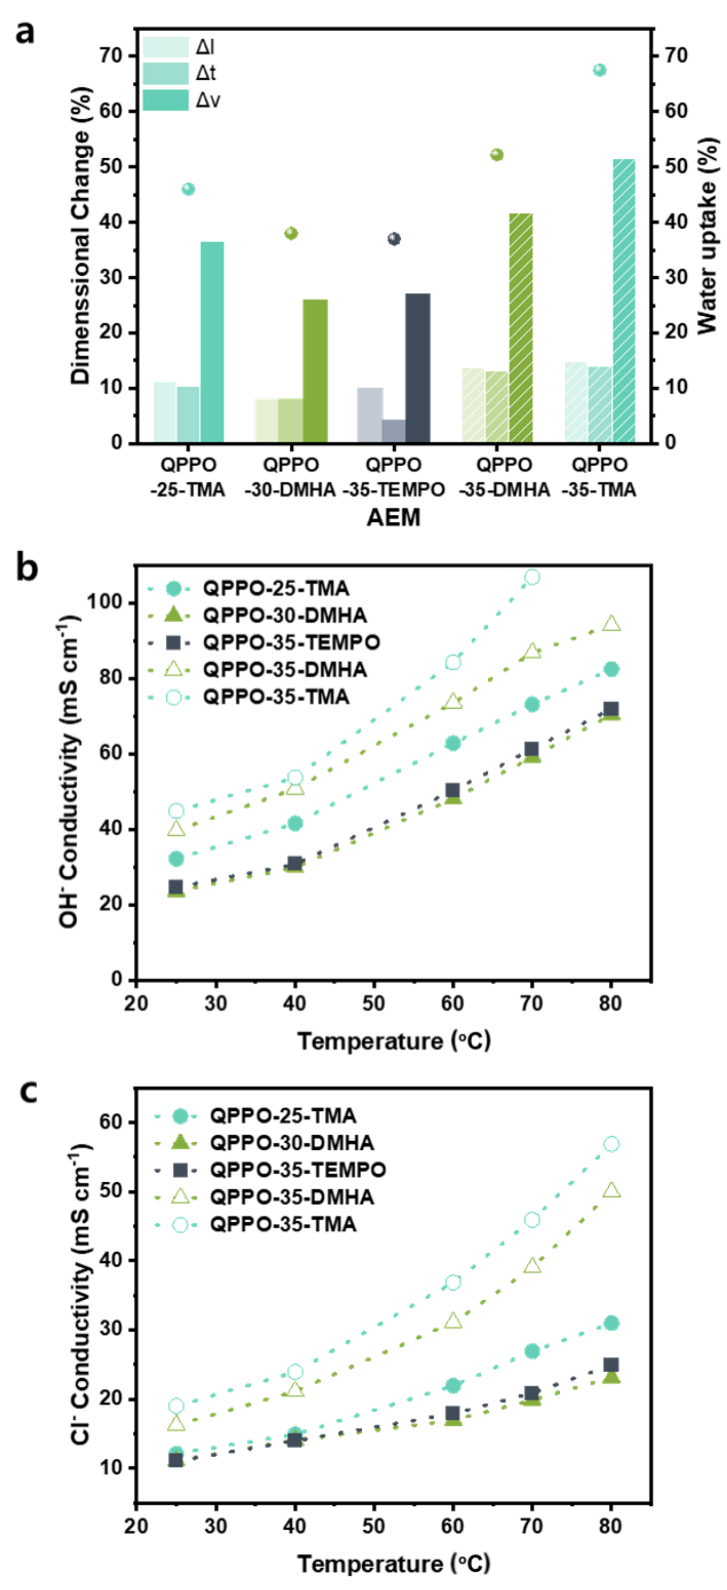


**Fig. S4** Characterization of QPPO-x-W AEMs. (a) Water uptake and dimensional variation of synthetic ionomers at 25 °C, (b) OH− conductivity of synthesized membranes as a function of temperature and (c) Cl− conductivity of synthesized membranes as a function of temperature.


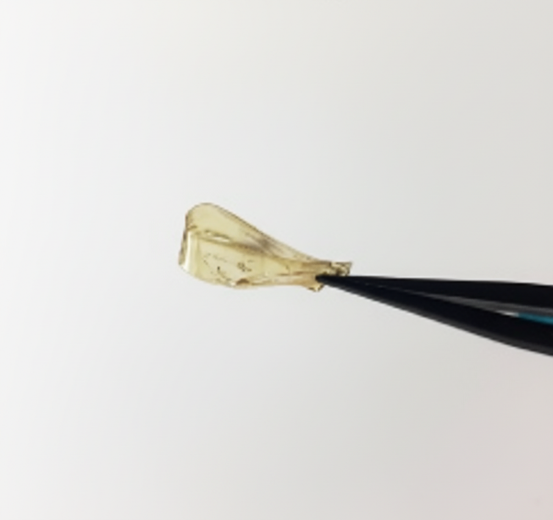


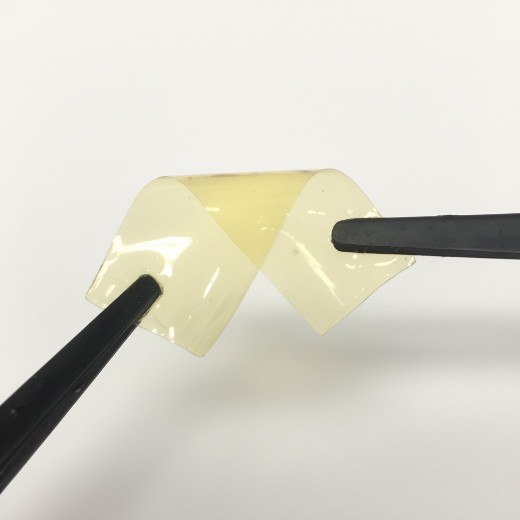


**Fig. S5** Digital photos of QPPO-35-TEMPO after chemical stability test (Top: folding, Bottom: twisting).


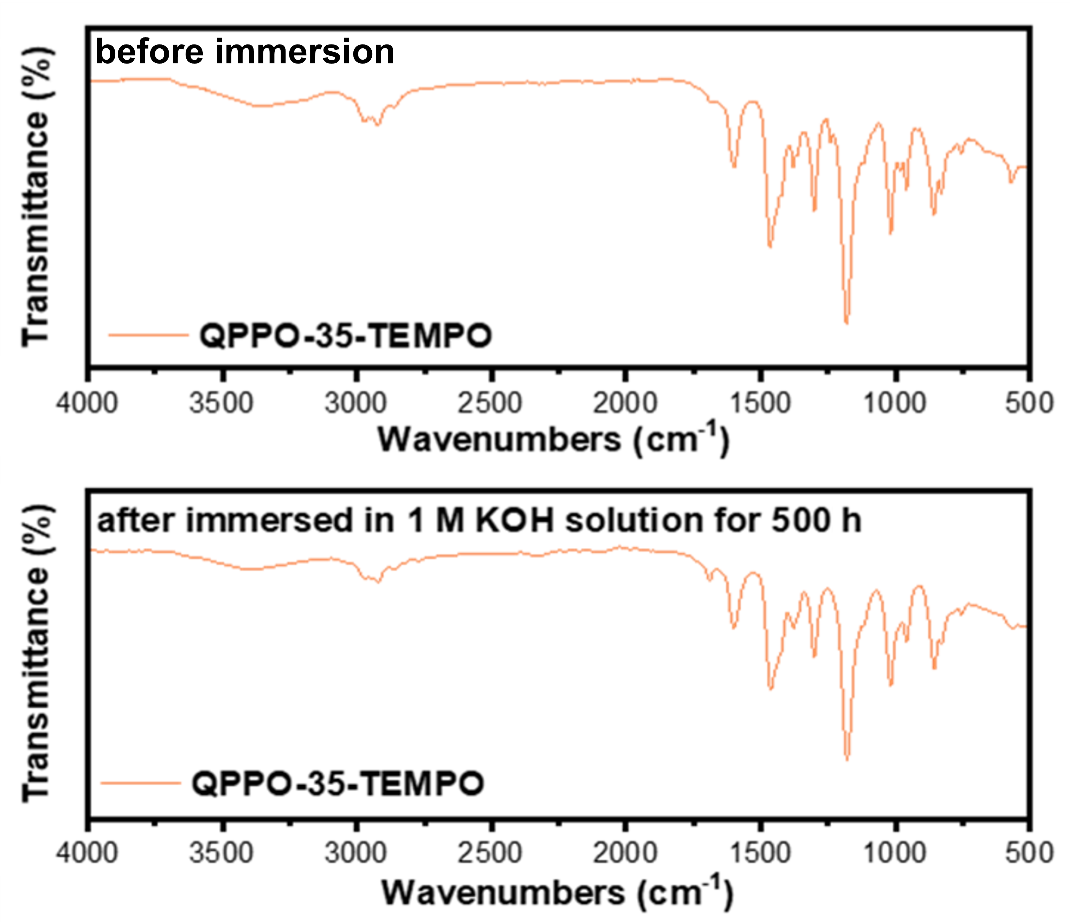


**Fig. S6** FT-IR spectra of QPPO-35-TEMPO before (top) and after (bottom) chemical stability test.

**Fig. S7** The schematic molecular structure of HQPC-TMA-2.4.


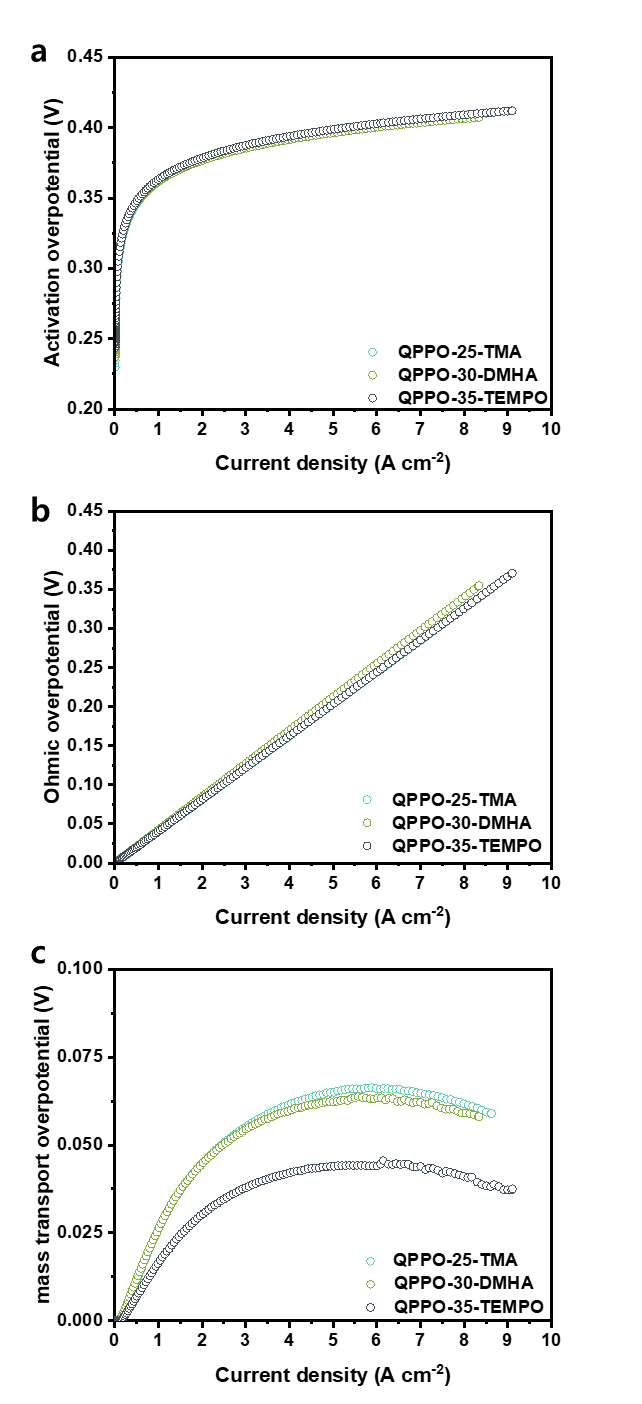


**Fig. S8** Calculated overpotentials of the 1.0 M KOH-fed AEMWEs (80 °C) with different anode ionomers. (a) Activation overpotential, (b) ohmic overpotential, and (c) mass-transport overpotential.

**Table S1** Mechanical and electrochemical properties of synthesized membranes.


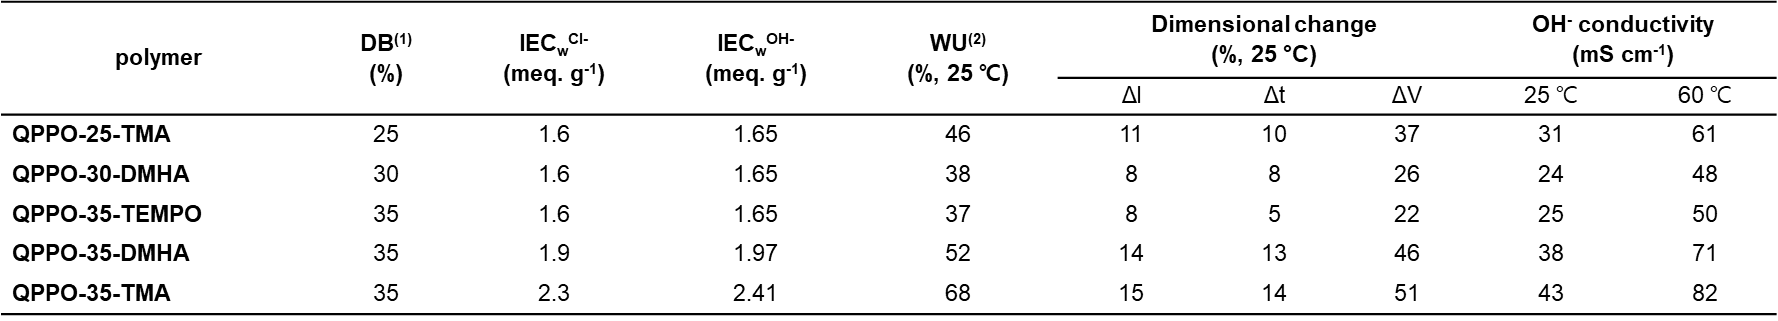


**Table S2** Detailed conditions of AEMWE single-cell with different QPPO-x-W membranes.

| **Components** | **QPPO-TMA** | **QPPO-DMHA** | **QPPO-DATMP** | **QPPO-TEMPO** |
| --- | --- | --- | --- | --- |
| Anode PTL | Ni Paper | | | |
| Anode CL | NiFe alloy (2.0 mgNiFe/cm2) | | | |
| Anode Ionomer | HQPC-TMA-2.4 (I/Cat = 0.15) | | | |
| Membrane | **QPPO-25-TMA (50 – 60 μm)** | **QPPO-30-DMHA (50 – 60 μm)** | **QPPO-35-DATMP (50 – 60 μm)** | **QPPO-35-TEMPO (50 – 60 μm)** |
| Cathode CL | PtRu/C (0.4 mgPtRu/cm2) | | | |
| Cathode Ionomer | HQPC-TMA-2.4 (I/Cat = 0.2) | | | |
| Cathode PTL | Carbon Paper w/MPL (JNT-30-A3) | | | |
| Bipolar Plates | Ni-coated SUS 316 / 1-channel serpentine flow field (2.2×2.3 cm2) | | | |

**Table S3** Detailed conditions of AEMFC single-cell with different QPPO-x-W membranes.

| **Components** | **QPPO-TMA** | **QPPO-DMHA** | **QPPO-DATMP** | **QPPO-TEMPO** |
| --- | --- | --- | --- | --- |
| Anode GDL | Carbon Paper w/MPL (JNT-30-A3) | | | |
| Anode CL | 60 wt.% PtRu/C (0.4 mgPtRu/cm2) | | | |
| Anode Ionomer | HQPC-TMA-2.4 (I/Cat = 0.2) | | | |
| Membrane | **QPPO-25-TMA (50 – 60 μm)** | **QPPO-30-DMHA (50 – 60 μm)** | **QPPO-35-DATMP (50 – 60 μm)** | **QPPO-35-TEMPO (50 – 60 μm)** |
| Cathode CL | 60 wt.% Pt/C (0.4 mgPt/cm2) | | | |
| Cathode Ionomer | HQPC-TMA-2.4 (I/Cat = 0.2) | | | |
| Cathode GDL | Carbon Paper w/MPL (JNT-30-A3) | | | |
| Bipolar Plates | Graphite / 1-channel serpentine flow field (2.2×2.3 cm2) | | | |

**Table S4** Detailed conditions of AEMWE single-cell with different QPPO-x-W ionomers on anode.

| **Components** | **QPPO-TMA** | **QPPO-DMHA** | **QPPO-TEMPO** |
| --- | --- | --- | --- |
| Anode PTL | Ni Paper | | |
| Anode CL | NiFe alloy (2.0 mgNiFe/cm2) | | |
| Anode Ionomer | **QPPO-25-TMA (I/Cat = 0.15)** | **QPPO-30-DMHA (I/Cat = 0.15)** | **QPPO-35-TEMPO (I/Cat = 0.15)** |
| Membrane | QPC-TMA-2.4 (50 μm) | | |
| Cathode CL | PtRu/C (0.4 mgPtRu/cm2) | | |
| Cathode Ionomer | HQPC-TMA-2.4 (I/Cat = 0.2) | | |
| Cathode PTL | Carbon Paper w/MPL | | |
| Bipolar Plates | Ni-coated SUS 316 / 1-channel serpentine flow field (2.2×2.3 cm2) | | |
